# Supplementary material
Source: PubMed Central journal article supplement (PMC4061157)
Supplement: NIHMS563098-supplement-Supplementary_Material.pdf [file NIHMS563098-supplement-Supplementary_Material.pdf]

# Web-based Supplementary Materials for “Bayesian Hidden Markov Models to Identify RNA-Protein Interaction Sites in PAR-CLIP”

Jonghyun Yun, Tao Wang and Guanghua Xiao

## Web Appendix A

This section elucidates the Dirichlet prior specification of Markov transition and initial probabilities. The Dirichlet prior is assumed on each row of the transition matrix with the following hyperparameters:

$$\begin{aligned}(\kappa_{11}, \kappa_{12}) &\sim \text{Dir}(\alpha_{\kappa_{11}}, \alpha_{\kappa_{12}}), \\(\kappa_{T,21}, \kappa_{T,22}, \kappa_{T,23}) &\sim \text{Dir}(\alpha_{\kappa_{T,21}}, \alpha_{\kappa_{T,22}}, \alpha_{\kappa_{T,23}}), \\(\kappa_{T,32}, \kappa_{T,33}) &\sim \text{Dir}(\alpha_{\kappa_{T,32}}, \alpha_{\kappa_{T,33}}), \\(\kappa_{N,21}, \kappa_{N,22}) &\sim \text{Dir}(\alpha_{\kappa_{N,21}}, \alpha_{\kappa_{N,22}}).\end{aligned}$$

For the initial distribution, we have

$$\begin{aligned}(\varphi_{T1}, \varphi_{T2}, \varphi_{T3}) &\sim \text{Dir}(\alpha_{\varphi_{T,1}}, \alpha_{\varphi_{T,2}}, \alpha_{\varphi_{T,3}}), \\(\varphi_{N1}, \varphi_{N2}) &\sim \text{Dir}(\alpha_{\varphi_{N,1}}, \alpha_{\varphi_{N,2}}).\end{aligned}$$

## Web Appendix B

This section describes the Metropolis algorithm that we employ to sample from (6) in Section 3.4. For state  $s = 1$ , we employ one dimensional random walks as the Metropolis jumping rule on  $\text{logit } \mu_1^{(t)}$  as follows:

$$\text{logit } \mu_1^* \sim \text{N}(\text{logit } \mu_1^{(t)}, \sigma),$$

where  $\sigma$  is chosen to be  $\sqrt{0.005}$ . For state  $s = 2$ , two dimensional random walks are employed on  $(\text{logit } \mu_2^{(t)}, \log \eta_2^{(t)})$  as follows:

$$[\text{logit } \mu_2^*, \log \eta_2^*] \sim \text{N}([\text{logit } \mu_2^{(t)}, \log \eta_2^{(t)}], \sigma \cdot \mathbf{I}_2),$$

where  $\mathbf{I}_2$  is a 2 by 2 identity matrix.

Noting that the proposed sample can be accepted only if it is contained in the constrained parameter space, the acceptance probability for  $\text{logit } \mu_1^*$  is

$$\min \left( 1, \frac{\mathbf{1}_{C_{\theta^{(t)}}}(\mu_1^*) \text{N}(\text{logit } \mu_1^* | \nu_{\mu_1}, \sigma_{\mu_1}) \prod_{I_{ij}=1} \text{BG}_c(X_{ij} | \mu_1^*, 0)}{\text{N}(\text{logit } \mu_1^{(t)} | \nu_{\mu_1}, \sigma_{\mu_1}) \prod_{I_{ij}=1} \text{BG}_c(X_{ij} | \mu_1^{(t)}, 0)} \right),$$

and the acceptance probability for  $(\text{logit } \mu_2^*, \log \eta_2^*)$  is

$$\min \left( 1, \frac{\mathbf{1}_{C_{\theta^{(t+1)}}}(\mu_2^*, \eta_2^*) \text{N}(\text{logit } \mu_2^* | \nu_{\mu_2}, \sigma_{\mu_2}) \text{N}(\log \eta_2^* | \nu_{\eta_2}, \sigma_{\eta_2}) \prod_{s=2}^3 \prod_{I_{ij}=s} \text{BG}_c(X_{ij} | \mu_2^*, \eta_2^*)}{\text{N}(\text{logit } \mu_2^{(t)} | \nu_{\mu_2}, \sigma_{\mu_2}) \text{N}(\log \eta_2^{(t)} | \nu_{\eta_2}, \sigma_{\eta_2}) \prod_{s=2}^3 \prod_{I_{ij}=s} \text{BG}_c(X_{ij} | \mu_2^{(t)}, \eta_2^{(t)})} \right).$$

## Web Appendix C

Let  $\mathbf{Y}_{[1:i]j}$  and  $\mathbf{I}_{[1:i]j}$  be the sequence of observations and hidden states, respectively, from the initial to the  $i$ -th location of region  $j$ . The first step is to evaluate forward probabilities

$$\begin{aligned}
 \phi_{ijrs} &\propto p(I_{i-1j} = r, I_{ij} = s, \mathbf{Y}_{ij} | \mathbf{N}, \mathbf{Y}_{[1:i-1]j}, \theta, \mathbf{K}, \varphi) \\
 &= p(I_{i-1,j} = r | N_{i-1,j}, \mathbf{Y}_{[1:i-1]j}, \theta, \mathbf{K}, \varphi) \\
 &\quad \times p(I_{ij} = s | N_{ij}, I_{i-1j} = r) p(\mathbf{Y}_{ij} | N_{ij}, I_{ij} = s, \theta),
 \end{aligned} \tag{S1}$$

where the normalizing constant is obtained by summing (S1) over  $r$  and  $s$ . In (S1) above, the second density is the nucleotide-dependent transition probability from  $r$  to  $s$ , and the third density can be computed from the likelihood function. The first density in (S1) can be evaluated recursively as

$$p(I_{i-1,j} = r | N_{i-1,j}, \mathbf{Y}_{[1:i-1]j}, \theta, \mathbf{K}, \varphi) = \sum_{k=1}^3 \phi_{i-1jkr}.$$

The second step is to sample  $I_{ij}$ 's from the posterior in the backward direction starting from each right terminal position  $n_j$  of Markov chains. For  $k = 0, \dots, n_j - 1$ , we draw  $I_{n_j-k,j}$  from

$$\begin{aligned}
 &p(I_{n_j-k,j} = r | \mathbf{N}, \mathbf{Y}, \theta, \mathbf{I}_{[n_j-k+1:n_j]j}, \mathbf{K}, \varphi) \\
 &= p(I_{n_j-k,j} = r | \mathbf{N}, \mathbf{Y}_{[1:n_j-k+1]j}, \theta, \mathbf{I}_{[n_j-k+1:n_j]j}, \mathbf{K}, \varphi) \\
 &\propto \phi_{n_j-k+1,j,r,I_{k+1,j}}.
 \end{aligned}$$

## Web Appendix D

Let  $n_{T,rs}$  and  $n_{N,rs}$  be the numbers of transitions from  $r$  to  $s$  when transitions occur onto genomic locations with  $T$  nucleotide and with non- $T$  nucleotide, respectively. Also, let  $n_{\varphi,Ts}$  and  $n_{\varphi,Ns}$  be the number of initial state  $s$  at the two types of nucleotide. The conditional distribution of the Markov transition kernels is

$$\begin{aligned}
 & p(\mathbf{K}, \varphi | \mathbf{Y}, \theta, \mathbf{I}) \\
 & \propto p(\mathbf{I} | \mathbf{K}, \varphi) p(\mathbf{K}) p(\varphi) \\
 & \propto \kappa_{11}^{\alpha_{\kappa_{11}} + n_{11} - 1} \kappa_{12}^{\alpha_{\kappa_{12}} + n_{12} - 1} \\
 & \quad \times \kappa_{T,21}^{\alpha_{\kappa_{T,21}} + n_{T,21} - 1} \kappa_{T,22}^{\alpha_{\kappa_{T,22}} + n_{T,22} - 1} \kappa_{T,23}^{\alpha_{\kappa_{T,23}} + n_{T,23} - 1} \\
 & \quad \times \kappa_{T,32}^{\alpha_{\kappa_{T,32}} + n_{T,32} - 1} \kappa_{T,33}^{\alpha_{\kappa_{T,33}} + n_{T,33} - 1} \\
 & \quad \times \kappa_{N,21}^{\alpha_{\kappa_{N,21}} + n_{N,21} - 1} \kappa_{N,22}^{\alpha_{\kappa_{N,22}} + n_{N,22} - 1} \\
 & \quad \times \varphi_{T1}^{\alpha_{\varphi_{T1}} + n_{\varphi,T1} - 1} \varphi_{T2}^{\alpha_{\varphi_{T2}} + n_{\varphi,T2} - 1} \varphi_{T3}^{\alpha_{\varphi_{T3}} + n_{\varphi,T3} - 1} \\
 & \quad \times \varphi_{N1}^{\alpha_{\varphi_{N1}} + n_{\varphi,N1} - 1} \varphi_{N2}^{\alpha_{\varphi_{N2}} + n_{\varphi,N2} - 1}.
 \end{aligned}$$

## Web Appendix E

Trace plots of MCMC sequences of eight parameters are presented in Figure S1. All the sequences quickly reach approximate stationary distributions.

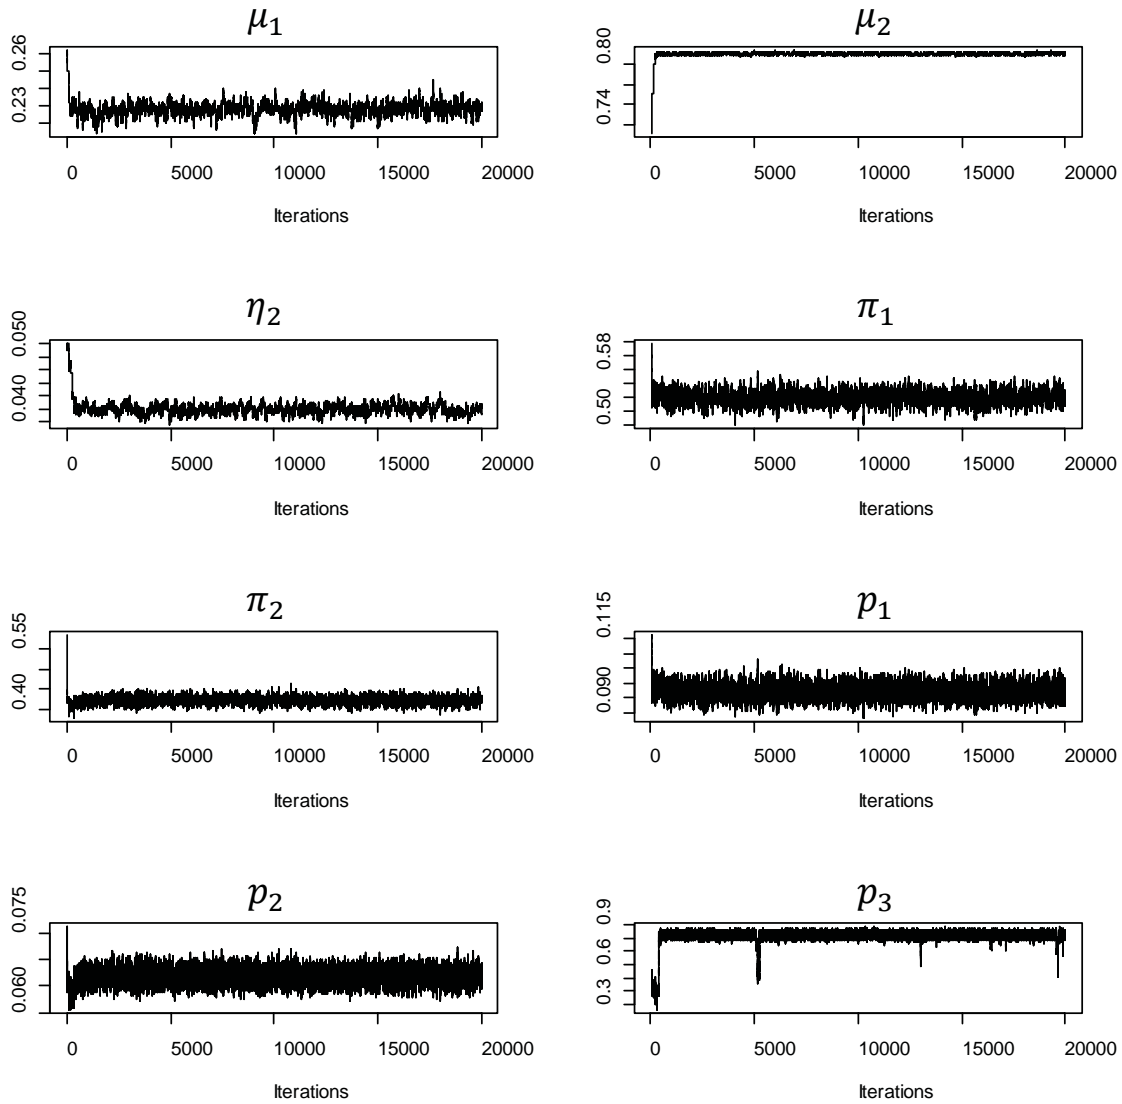

Figure S1: Trace plots for MCMC sequences of eight parameters.

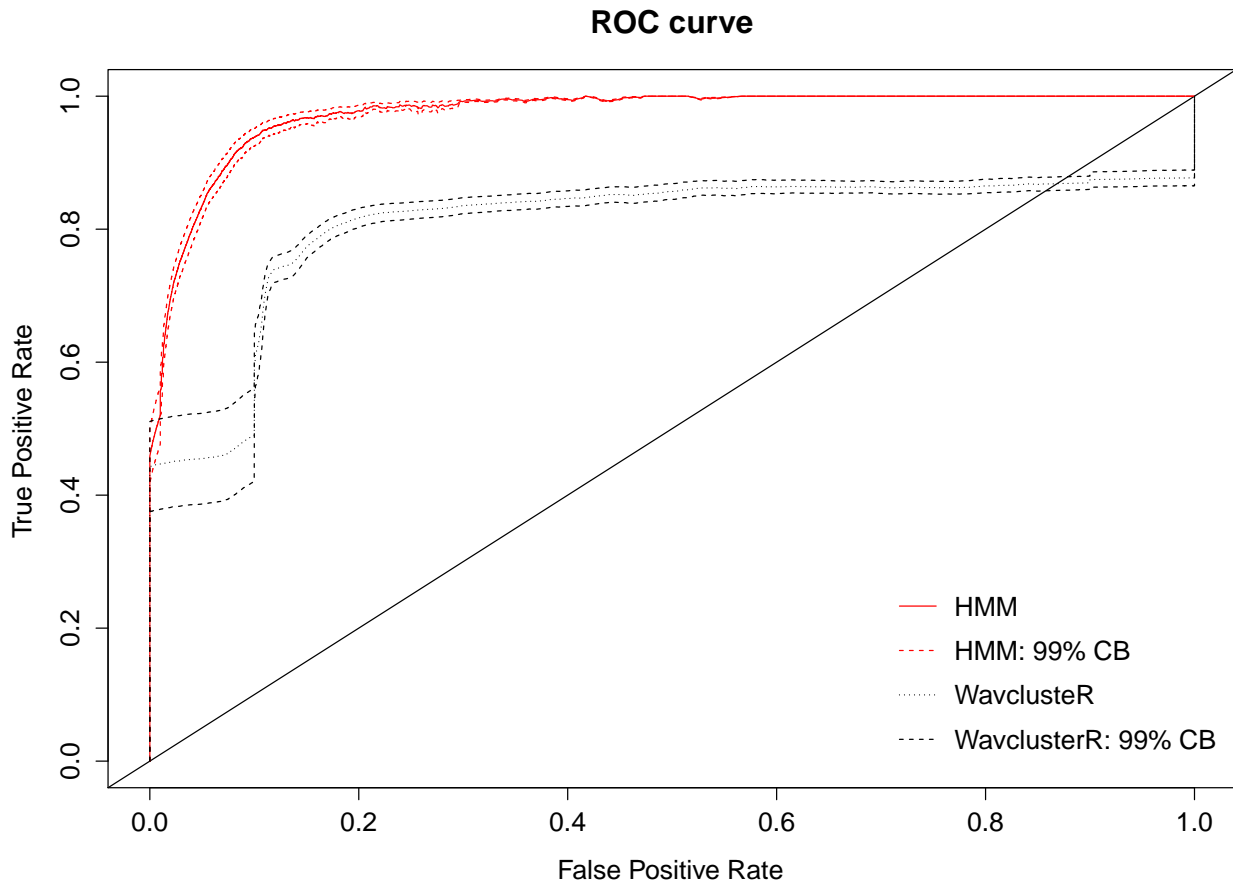

Figure S2: The smoothed ROC curves (based on sites with  $M_{ij} > 0$ ) for the HMM (solid line) and the wavClusterR (dotted line) to identify binding sites based on 100 simulated datasets. The dashed lines represent 99 % confidence bands of each curve. The local constant regressions with truncated Gaussian kernels are used for smoothing.

## Web Appendix F

The 2nd stage of the wavClusterR employs the wavelet analysis on regions containing non-experimentally induced mutation sites identified by the 1st stage. The 2nd stage filters out regions with no peaks, and identifies binding regions. In the simulation study, however, we compare the performance of identifying binding sites, not regions containing binding sites. Also, no method to rank the identified regions has been proposed by Sievers et al., which makes the comparison in this study unclear.

Regarding to Simulation Study 1 in Section 4.1, the smoothed ROC curves based on sites with  $M_{ij} > 0$  are presented in Figure S2. Based on all simulated observations ( $M_{ij} \geq 0$ ),

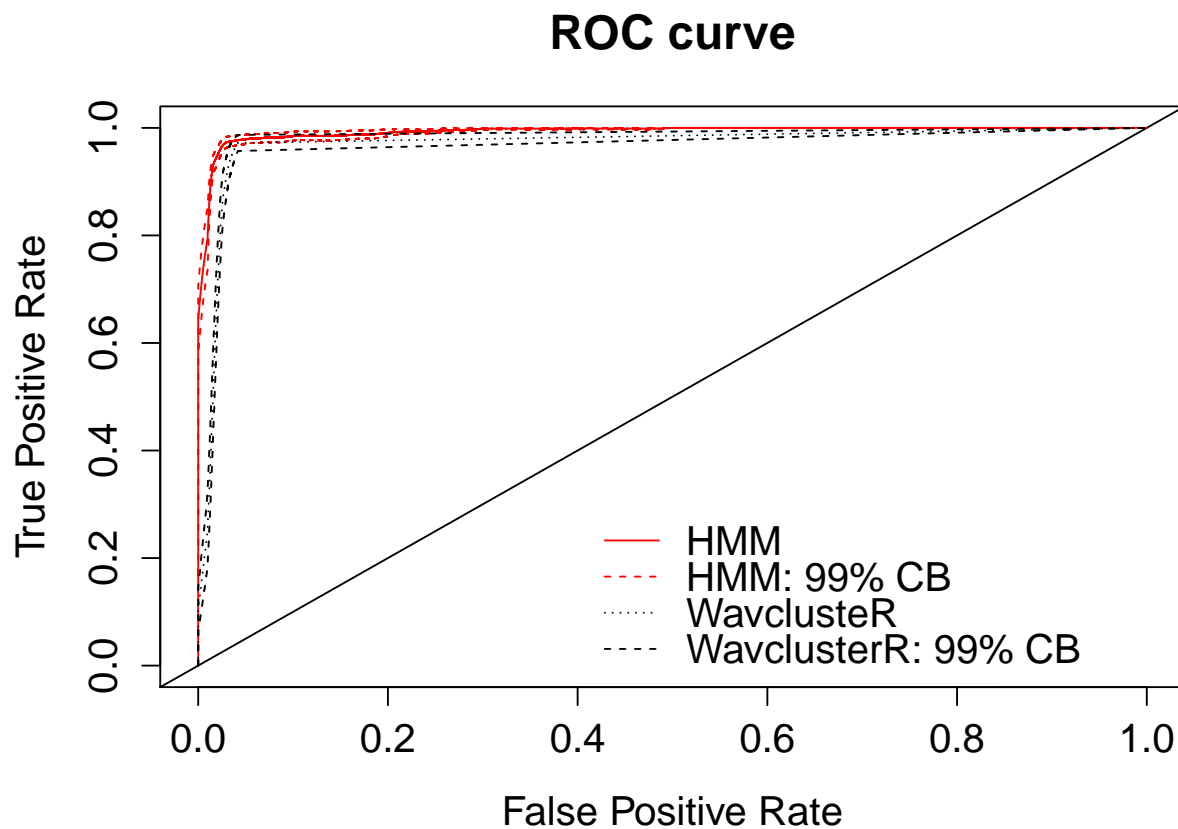

Figure S3: The raw ROC curves (based on all observations) for the HMM (solid line) and the wavClusterR (dotted line) to identify binding sites based on 100 simulated datasets. The dashed lines represent 99 % confidence bands of each curve. Local constant regressions with truncated Gaussian kernels are used for smoothing.

the average AUC of the HMM, the wavClusterR and the difference between the two methods ( $AUC_{\text{HMM}} - AUC_{\text{WCR}}$ ) are 0.9937 (s.e. 0.0005), 0.9783 (s.e. 0.0013) and 0.0153 (s.e. 0.0014), respectively. The p-value of the Wilcoxon rank test with an one-sided alternative is less than 0.0001. The smoothed raw ROC curves based on all sites are presented in Figure S3.

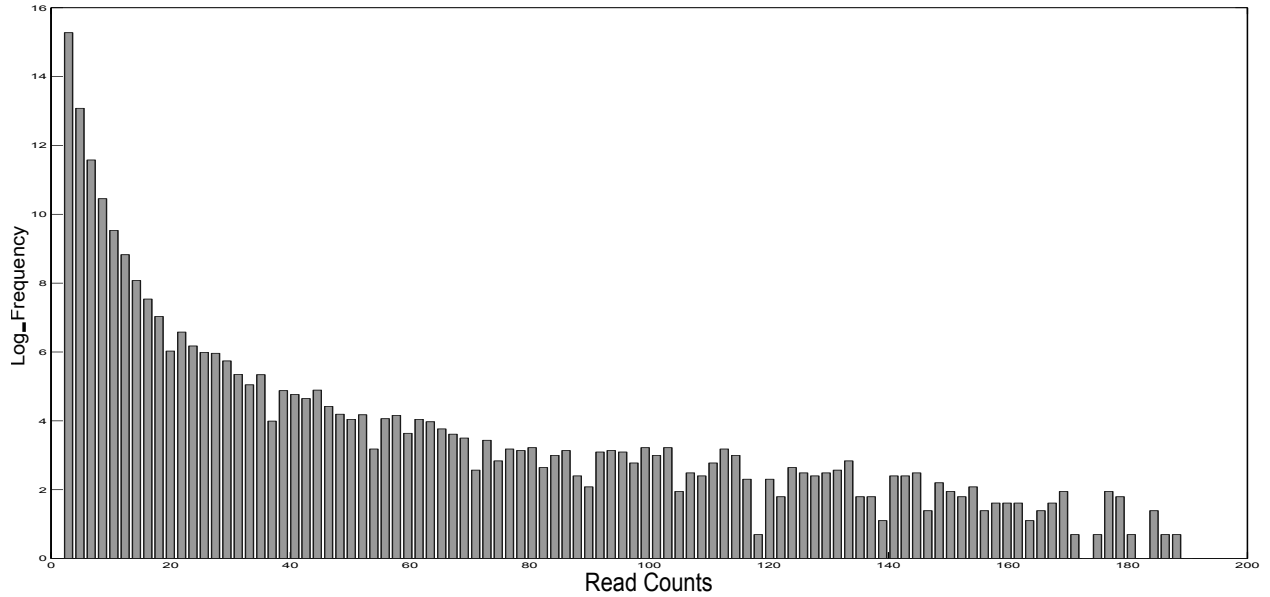

Figure S4: A histogram of read counts  $X_{ij} \geq 1$  in the data described in Section 2. Log-transformed frequencies are used to avoid the scale problem in raw frequencies.

## Web Appendix G

Often, the NB likelihood is interpreted as an expansion of the Poisson likelihood to take the overdispersion in the count data into account. In our empirical study, The NB likelihood outperforms the Poisson likelihood for fitting the read count  $X_{ij}$ . Along with the PPC under the HMM framework, furthermore, we demonstrate that the BG likelihood fits  $X_{ij}$  better than the NB likelihood by evaluating the goodness of fit for the three likelihoods based on the real dataset described in Section 2.

We present a histogram of read counts  $X_{ij} \geq 1$  with log-frequencies (Figure S4) and the goodness of fit for the BG, NB and Poisson models (Table S1). The data described in Section 2 is used. For all truncation cutoffs we consider, the BG model achieves the greatest likelihood among the three models.



Table S1: Log-likelihoods for three models (the BG, NB and Poisson) on  $X_{ij} \geq c$  are presented with the truncation cutoff  $c = 1, \dots, 5$ .

|                | $c = 1$  | $c = 2$  | $c = 3$  | $c = 4$  | $c = 5$ |
|----------------|----------|----------|----------|----------|---------|
| BG (df=2)      | -5166142 | -2074198 | -1010287 | -559104  | -339918 |
| NB (df=2)      | -5236154 | -2116632 | -1037521 | -576601  | -351437 |
| Poisson (df=1) | -6784937 | -7066748 | -2295065 | -1377220 | -790234 |

## Web Appendix H

We measure the goodness of fit for two-component mixture models equipped with Poisson, negative binomial (NB) and beta geometric (BG) likelihoods on the read count  $X_{ij} > c$  in the dataset described in Section 2. We fix the shape parameter  $\eta_1 = 0$  in the BG mixture model. As shown in Table S2, the NB mixture outperforms the Poisson mixture in all settings, and the BG mixture outperforms the NB mixture in settings with  $c \leq 5$ , which preserve a majority of samples. The capability of the BG distribution that controls the high-densities on small counts and the tail thickness enhances the mixture BG model to fit the read count distribution.

Table S2: The log-likelihood (top), AIC (middle) and BIC (bottom) with  $c = 1, \dots, 6$  are presented for three models: two-component Poisson, NB and BG mixture models. Each read-marked performance criterion indicates models of best performance for each  $c$  and performance criteria.

| c |          | Poisson (df=3) | NB (df=5)      | BG (df=4)       |
|---|----------|----------------|----------------|-----------------|
| 6 | Log-like | -309854        | <b>-223392</b> | -223434         |
|   | AIC      | 619714         | <b>446794</b>  | 446877          |
|   | BIC      | 619743         | <b>446841</b>  | 446915          |
| 5 | log-like | -454145        | <b>-340061</b> | -340065         |
|   | AIC      | 908296         | <b>680133</b>  | 680139          |
|   | BIC      | 908326         | 680183         | <b>680179</b>   |
| 4 | Log-like | -714917        | -559266        | <b>-559067</b>  |
|   | AIC      | 1429841        | 1118543        | <b>1118143</b>  |
|   | BIC      | 1429873        | 1118596        | <b>1118186</b>  |
| 3 | Log-like | -1219542       | -1010715       | <b>-1010045</b> |
|   | AIC      | 2439090        | 2021440        | <b>2020098</b>  |
|   | BIC      | 2439124        | 2021496        | <b>2020143</b>  |
| 2 | Log-like | -2355468       | -2075873       | <b>-2074269</b> |
|   | AIC      | 4710943        | 4151757        | <b>4148546</b>  |
|   | BIC      | 4710977        | 4151818        | <b>4148595</b>  |
| 1 | Log-like | -5552976       | -5167805       | <b>-5163827</b> |
|   | AIC      | 11105959       | 10335621       | <b>10327663</b> |
|   | BIC      | 11105999       | 10335688       | <b>10327717</b> |

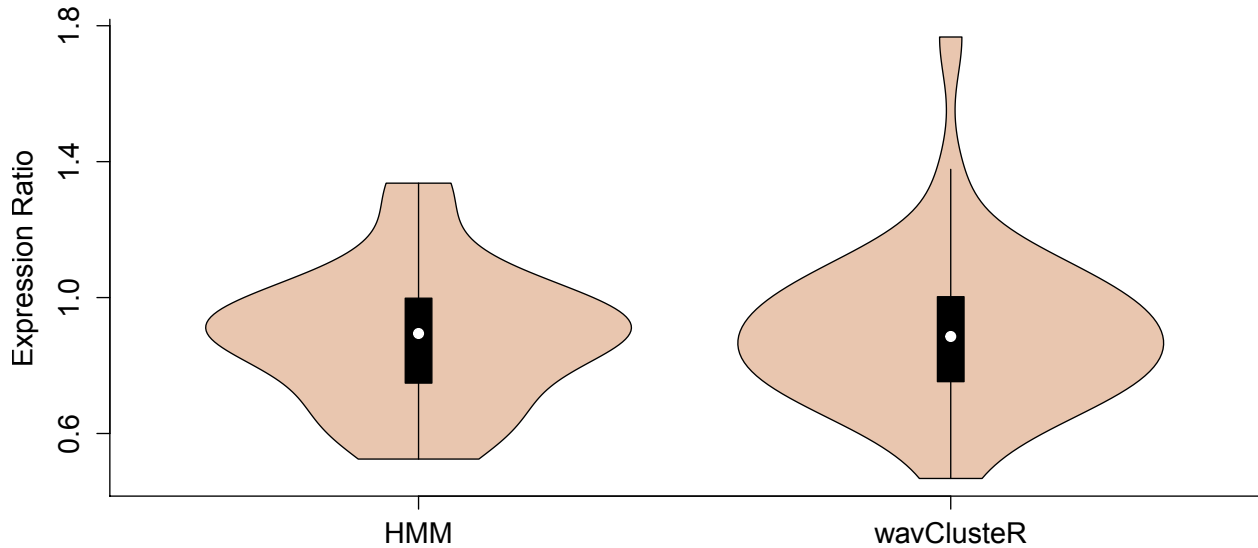

Figure S5: Violin plots of expression ratios are presented. For each method, top 35 binding sites which are found in the expression ratio matrix are used.

## Web Appendix I

Another comparison is made by examining the expression ratios of top 35 identified binding sites whose expression ratios are found in the expression ratio matrix. The average expression ratios of these sites are 0.8847 (s.e. 0.0331) for the HMM and 0.8983 (s.e. 0.1518) for the wavClusterR, respectively. The t-tests are carried out on these sites to see if the mean expression ratios are less than 1. The p-value based on our result is 0.0007, whereas the p-value for the wavClusterR is 0.2537. The list of the 35 binding sites and the ratios are presented in Table S3, and violin plots of the ratios are presented in Figure S5. Overall, our method provides the identification results with smaller expression ratios ( $< 1$ ), which implies our results show stronger evidence of the RNA-RBP interaction.

In Section 5, the posterior mean of read counts on enriched locations is 11.5, and the posterior mean of the mutation probability on true mutation sites is 0.8224. For enriched locations with  $T$  nucleotide, the posterior mean of the mutation-read ratio is 0.0248. Our method identifies enriched sites and true mutation sites simultaneously. However, peaks without enough mutations will not be identified as binding sites. A region containing the identified binding site is presented in Figure S6. Among enriched locations, our method

Table S3: The expression ratios of top identified binding sites which are found in the expression ratio matrix. Chromosome (Chr), genomic position (GP) and expression ratio (ER) are presented for our method (HMM) and the wavClusteR.

| HMM   |           |        | wavClusteR |           |        |
|-------|-----------|--------|------------|-----------|--------|
| Chr   | GP        | ER     | Chr        | GP        | ER     |
| chr20 | 5991931   | 0.8971 | chr11      | 65273253  | 1.7669 |
| chr2  | 133013144 | 1.3367 | chr1       | 193054752 | 1.0269 |
| chr16 | 47538729  | 0.9963 | chr12      | 1310444   | 0.9377 |
| chr8  | 70602341  | 1.0679 | chr5       | 170423513 | 0.8175 |
| chr6  | 30582101  | 0.9503 | chr7       | 99228102  | 0.8284 |
| chr13 | 79894144  | 0.8779 | chrX       | 84502511  | 0.8366 |
| chr1  | 243998148 | 0.5829 | chr7       | 135321862 | 0.9640 |
| chr8  | 21779574  | 0.9459 | chr12      | 69667727  | 0.8985 |
| chr8  | 25364928  | 0.9042 | chr5       | 65291534  | 1.0876 |
| chr13 | 20298318  | 0.8792 | chr1       | 145509180 | 0.9674 |
| chr8  | 100135779 | 0.8927 | chr15      | 99281763  | 1.1299 |
| chr9  | 33919729  | 0.8154 | chr4       | 39734173  | 0.7533 |
| chr3  | 48975677  | 0.6432 | chrX       | 103435815 | 0.9465 |
| chr5  | 115204870 | 0.5248 | chr8       | 26190602  | 0.8477 |
| chr2  | 133012147 | 1.3367 | chr19      | 39221097  | 0.9310 |
| chr17 | 30852610  | 1.1166 | chr10      | 27457826  | 0.6747 |
| chr5  | 10265006  | 0.9001 | chr19      | 44601427  | 0.7396 |
| chr13 | 50648655  | 1.0000 | chr10      | 13252859  | 0.7518 |
| chr10 | 22974076  | 0.7302 | chr18      | 57569092  | 0.6678 |
| chr19 | 44937168  | 1.0000 | chr3       | 160123468 | 0.6795 |
| chr7  | 156990101 | 1.0235 | chr11      | 120215430 | 0.7185 |
| chr5  | 140700257 | 0.9321 | chr14      | 55513272  | 0.7201 |
| chr13 | 50650083  | 1.0000 | chr18      | 13030777  | 0.7789 |
| chr14 | 55755090  | 0.8749 | chr5       | 56553359  | 0.9051 |
| chr3  | 152099252 | 0.8828 | chr3       | 128489715 | 0.7648 |
| chr2  | 181865037 | 0.6673 | chr2       | 153616778 | 0.5900 |
| chr18 | 54278124  | 0.7665 | chr8       | 33357258  | 0.8855 |
| chr4  | 139086944 | 0.8943 | chr17      | 34155410  | 1.3324 |
| chr1  | 33151486  | 0.6511 | chr12      | 4665775   | 0.4676 |
| chr14 | 97004355  | 0.6306 | chr4       | 108835835 | 1.0826 |
| chr20 | 25597193  | 1.2463 | chr7       | 116617491 | 1.0677 |
| chrX  | 84499094  | 0.8366 | chr4       | 108835574 | 1.0826 |
| chr12 | 101013504 | 0.5541 | chr21      | 38800124  | 0.8610 |
| chr14 | 60761098  | 0.6947 | chr19      | 36719613  | 1.0349 |
| chr6  | 21594140  | 0.9142 | chr12      | 69233706  | 0.9780 |

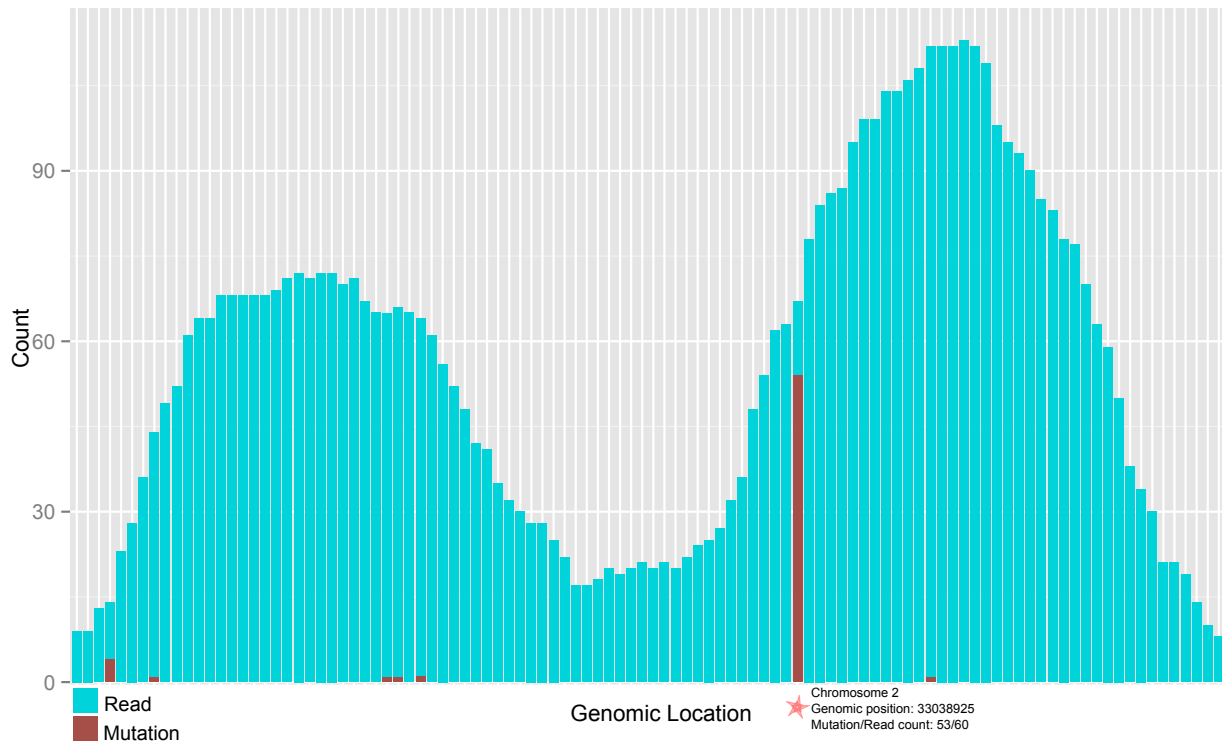

Figure S6: A barplot of mutation and read counts on the region containing one binding site (marked with a star, genomic location: 33038925 in chromosome 2).

pinpoints the location (marked with a star in the figure) whose mutation-read ratio is close enough to the true mutation probability, and identifies it as the binding site.
